# Supplementary material
Source: PubMed Central journal article supplement (PMC2656170)
Supplement: 0807880106_ST1_PDF.pdf [file 0807880106_ST1_PDF.pdf]

**Table S1**

Sources of sequence data.

| Full name                           | Abbreviation in alignments | Source of data                               | Taxon is a composite of                                                                                                                                                                 |
|-------------------------------------|----------------------------|----------------------------------------------|-----------------------------------------------------------------------------------------------------------------------------------------------------------------------------------------|
| <i>Acanthamoeba</i>                 | AcanCast                   | NCBI                                         | <i>Acanthamoeba castellanii</i> ,<br><i>Acanthamoeba culbertsoni</i> ,<br><i>Acanthamoeba</i> sp.                                                                                       |
| <i>Alexandrium tamarense</i>        | AlexTama                   | NCBI                                         |                                                                                                                                                                                         |
| <i>Amphidinium carterae</i>         | AmphCart                   | NCBI                                         |                                                                                                                                                                                         |
| <i>Andalucia incarcerationata</i>   | AndalInca                  | Roger                                        |                                                                                                                                                                                         |
| <i>Bigelowiella natans</i>          | BigeNata                   | NCBI                                         |                                                                                                                                                                                         |
| <i>Blastocladiella emersoni</i>     | BlasEmer                   | NCBI                                         | <i>Blastocladiella emersonii</i> ,<br><i>Blastocladiella britanica</i>                                                                                                                  |
| <i>Blastocystis hominis</i>         | BlasHomi                   | Roger                                        |                                                                                                                                                                                         |
| <i>Cercomonas longicauda</i>        | Cerclong                   | Lang                                         |                                                                                                                                                                                         |
| <i>Chlamydomonas reinhardtii</i>    | ChlaRein                   | NCBI                                         |                                                                                                                                                                                         |
| <i>Chondrus crispus</i>             | ChonCris                   | NCBI                                         |                                                                                                                                                                                         |
| <i>Cyanophora paradoxa</i>          | CyanPara                   | NCBI                                         |                                                                                                                                                                                         |
| <i>Dictyostelium discoideum</i>     | DictDisc                   | NCBI                                         |                                                                                                                                                                                         |
| <i>Drosophila melanogaster</i>      | DrosMela                   | NCBI                                         |                                                                                                                                                                                         |
| <i>Emiliana huxley</i>              | EmilHuxl                   | NCBI                                         |                                                                                                                                                                                         |
| <i>Euglena gracilis</i>             | EuglGrac                   | NCBI                                         |                                                                                                                                                                                         |
| <i>Giardia intestinalis</i>         | GiariNte                   | NCBI                                         |                                                                                                                                                                                         |
| <i>Glaucocystis nostochinearum</i>  | GlauNost                   | NCBI                                         |                                                                                                                                                                                         |
| <i>Histiona aroides</i>             | HistAroi                   | Lang                                         |                                                                                                                                                                                         |
| <i>Homo sapiens</i>                 | HomoSapi                   | NCBI                                         |                                                                                                                                                                                         |
| <i>Jakoba bahamensis</i>            | JakoBaha                   | Lang                                         |                                                                                                                                                                                         |
| <i>Jakoba libera</i>                | JakoLibe                   | Lang                                         |                                                                                                                                                                                         |
| <i>Leishmania</i> sp.               | LeisMajo                   | NCBI,<br>Wellcome Trust,<br>Sanger Institute | <i>Leishmania major</i> ,<br><i>Leishmania donovani</i> ,<br><i>Leishmania infantum</i> ,<br><i>Leishmania tarentolae</i> ,<br><i>Leishmania amazonensis</i> ,<br><i>Leishmania</i> sp. |
| ' <i>Malawimonas californiana</i> ' | MalaCali                   | Lang                                         |                                                                                                                                                                                         |
| <i>Malawimonas jakobiformis</i>     | MalaJako                   | Lang                                         |                                                                                                                                                                                         |
| <i>Mastigamoeba balamuthi</i>       | MastBala                   | Roger                                        |                                                                                                                                                                                         |
| <i>Micromonas</i> sp.               | MicromSp                   | NCBI                                         |                                                                                                                                                                                         |
| <i>Monosiga brevicollis</i>         | MonoBrev                   | NCBI                                         | <i>Monosiga brevicollis</i> ,<br><i>Monosiga ovata</i>                                                                                                                                  |
| <i>Monocercomonoides</i> sp.        | MonoceSp                   | Dacks, Embley, Hampl                         |                                                                                                                                                                                         |
| <i>Naeglia gruberi</i>              | NaegGrub                   | Roger, NCBI                                  | <i>Naegleria gruberi</i> ,<br><i>Naegleria fowleri</i>                                                                                                                                  |
| <i>Oryza sativa</i>                 | OryzSati                   | NCBI                                         |                                                                                                                                                                                         |
| <i>Oxytricha trifallax</i>          | OxytTrif                   | NCBI                                         |                                                                                                                                                                                         |
| <i>Pavlova lutheri</i>              | PavILuth                   | NCBI                                         |                                                                                                                                                                                         |
| <i>Physarum polycephalum</i>        | PhysPoly                   | NCBI                                         |                                                                                                                                                                                         |

|                                      |          |                                          |                                                                                                                                |
|--------------------------------------|----------|------------------------------------------|--------------------------------------------------------------------------------------------------------------------------------|
| <i>Phytophthora infestans</i>        | PhytInfe | NCBI                                     | <i>Phytophthora infestans</i> ,<br><i>Phytophthora palmivora</i>                                                               |
| <i>Porphyra yezoensis</i>            | PorpYezo | NCBI                                     | <i>Porphyra yezoensis</i> ,<br><i>Porphyra haitanensis</i> ,<br><i>Porphyra purpurea</i>                                       |
| <i>Proterospongia</i>                | ProtLike | King                                     |                                                                                                                                |
| <i>Reclinomonas americana</i>        | ReclAmer | Lang                                     |                                                                                                                                |
| <i>Sawyeria marylandensis</i>        | SawyMary | Roger                                    |                                                                                                                                |
| ' <i>Seculamonas ecuadoriensis</i> ' | SecuEcua | Lang                                     |                                                                                                                                |
| <i>Spironucleus barkhanus</i>        | SpirBark | NCBI, Roger                              |                                                                                                                                |
| <i>Stachyamoeba lipophora</i>        | StacLipo | Lang                                     |                                                                                                                                |
| <i>Tetrahymena pyriformis</i>        | TetrPyri | NCBI                                     | <i>Tetrahymena pyriformis</i> ,<br><i>Tetrahymena</i> sp.,<br><i>Tetrahymena paravorax</i> ,<br><i>Tetrahymena thermophila</i> |
| <i>Thalassiosira pseudonana</i>      | ThalPseu | JGI                                      |                                                                                                                                |
| <i>Toxoplasma gondii</i>             | ToxoGond | NCBI, TIGR                               |                                                                                                                                |
| <i>Trichomonas vaginalis</i>         | TricVagi | NCBI, TIGR                               |                                                                                                                                |
| <i>Trimastix pyriformis</i>          | TrimPyri | Roger                                    | <i>Trimastix pyriformis</i> ,<br><i>Trimastix marina</i>                                                                       |
| <i>Trypanosoma cruzi</i>             | TrypCruz | NCBI, Wellcome Trust<br>Sanger Institute | <i>Trypanosoma cruzi</i> ,<br><i>Trypanosoma brucei</i> ,<br><i>Trypanosoma congolense</i>                                     |
| <i>Ustilago maydis</i>               | UstiMayd | NCBI                                     |                                                                                                                                |
