# Supplementary material
Source: PubMed Central journal article supplement (PMC2656170)
Supplement: 0807880106_ST2_PDF.pdf [file 0807880106_ST2_PDF.pdf]

mcm-F  
mra1  
nsf1-C  
nsf1-E  
nsf1-G  
nsf1-H  
nsf1-I  
nsf1-J  
nsf1-K  
nsf1-L  
nsf1-M  
nsf2-A  
nsf2-B  
nsf2-F  
pace2B  
Pace2C  
pace5  
psma-A  
psma-B  
psma-C  
psma-D  
psma-E  
psma-F  
psma-G  
psma-H  
psma-I  
psma-J  
psmb-K  
psmb-L  
psmb-M  
psmb-N  
rad23  
Rad51A  
rla2a  
rla2b  
Rpl1  
Rpl13A  
Rpl13e  
Rpl14  
Rpl15  
Rpl18  
Rpl2  
Rpl24A  
Rpl3  
Rpl4b  
Rpl5  
Rpl7  
rpl11  
rpl12  
rpl17  
rpl19  
rpl20  
rpl21  
rpl26  
rpl27  
rpl30  
rpl31  
rpl32  
rpl33A
