# Supplementary material
Source: PubMed Central journal article supplement (PMC2656170)
Supplement: 0807880106_ST3_PDF.pdf [file 0807880106_ST3_PDF.pdf]

**Table S3**

Topology testing.

| Topology                    | Uniform model |              |              | Separate model |              |              |
|-----------------------------|---------------|--------------|--------------|----------------|--------------|--------------|
|                             | AU test       | KH test      | SH test      | AU test        | KH test      | SH test      |
| (((Pr,DT)Di)(R,C)A)(Ma,U)   | <b>0.651</b>  | <b>0.627</b> | <b>0.877</b> | <b>0.678</b>   | <b>0.600</b> | <b>0.884</b> |
| (((Pr,DT)Di)((R,C)A))(Ma,U) | <b>0.499</b>  | <b>0.373</b> | <b>0.775</b> | <b>0.574</b>   | <b>0.400</b> | <b>0.814</b> |
| (((Pr,DT)Di)Ma)((R,C)A)U    | <b>0.111</b>  | <b>0.159</b> | <b>0.376</b> | <b>0.241</b>   | <b>0.236</b> | <b>0.588</b> |
| (((Pr,DT)Ma)Di)((R,C)A)U    | 0.02          | <b>0.051</b> | <b>0.065</b> | <b>0.166</b>   | <b>0.168</b> | <b>0.32</b>  |
| (((Pr,DT)(Ma,Di))(R,C)A)U   | 0.009         | 0.029        | 0.04         | 0.049          | <b>0.082</b> | <b>0.156</b> |
| (((Pr,DT)Di)Ma)(R,C)A)U     | 1.00E-68      | 0            | 0.002        | 0.002          | 0.001        | 0.022        |
| (((Pr,DT)Ma)Di)(R,C)A)U     | 8.00E-06      | 1.00E-04     | 0.001        | 0.014          | 0.016        | 0.055        |
| (((Pr,Ma)DT)Di)((R,C)A)U    | 2.00E-04      | 0.003        | 0.003        | 0.001          | 0.03         | 0.04         |
| (((DT,Ma)Pr)Di)((R,C)A)U    | 1.00E-78      | 0.001        | 0.001        | 3.00E-04       | 0.011        | 0.014        |
| (((Pr,DT)(Ma,Di))(R,C)A)U   | 1.00E-48      | 0            | 1.00E-04     | 0.001          | 0.001        | 0.005        |
| (((Ma,Pr)DT)Di)(R,C)A)U     | 5.00E-65      | 0            | 0            | 4.00E-04       | 0.001        | 0.005        |
| (((Ma,DT)Pr)Di)(R,C)A)U     | 2.00E-07      | 0            | 0            | 3.00E-56       | 2.00E-04     | 0.001        |

Table summarizes the p-values of three types of topology tests – the approximately unbiased test (AU), the Kishino-Hasegawa test (KH) and the Shimodaira-Hasegawa test (SH) – all performed with both the uniform or separate (protein-specific) likelihood models. Topology number 1 has the overall highest likelihood for both models. In topologies 1 and 2 the Excavata are polyphyletic, whereas the remaining topologies represent plausible hypothesis where Excavata are monophyletic. The instances in which the topology cannot be rejected at the 5% level of significance are highlighted in bold. A=Archaeplastida, C=Chromalveolata, Di=Discoba, DT=diplomonads and *Trichomas*, Ma=*Malawimonas*, Pr=Preaxostyla, R=Rhizaria, U=unikonts.
